# Supplementary material
Source: MDPI journal article supplement (https://www.mdpi.com/2673-4583/8/1/87)
Supplement: s1 [file s1]

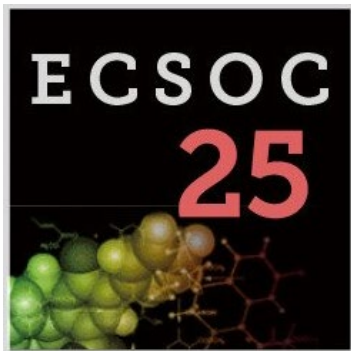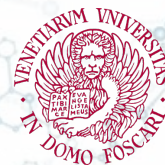

Università  
Ca' Foscari  
Venezia

# *N,N*-dimethyl-4-amino-2,1,3-benzothiadiazole: synthesis and luminescent solvatochromism

*Valentina Ferraro*<sup>1,\*</sup>, *Matteo Girotto*<sup>1</sup>, *Marco Bortoluzzi*<sup>1</sup>

<sup>1</sup> Dipartimento di Scienze Molecolari e Nanosistemi, Università Ca' Foscari Venezia, Via Torino 155, 30170 Mestre (VE), Italy. E-mail: [valentina.ferraro@unive.it](mailto:valentina.ferraro@unive.it)

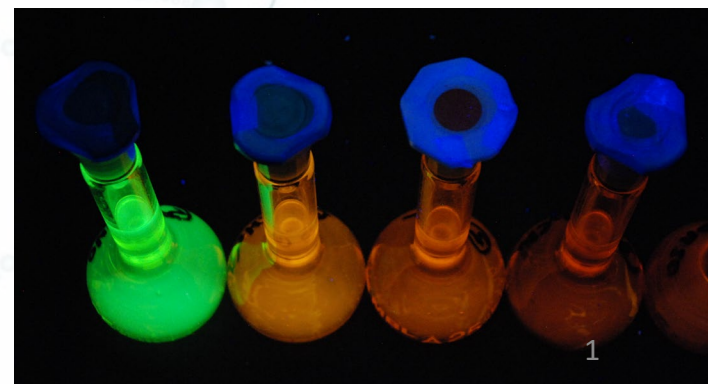

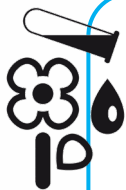

## Herbicide, fungicide and antibacterial agents

B.A.D. Neto et al., *Eur. J. Org. Chem.* (2013) 228.

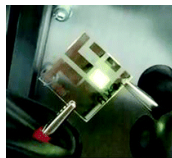

## OLEDs

D. Volz et al., *Green Chem.* **17** (2015) 1988.

Y. Zhang et al., *Sci. China Chem.* **64** (2021) 341.

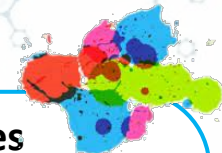

## Dyes

A. Pazini et al., *Tetrahedron Lett.* **59** (2008) 2994.

A. Pazini et al., *J. Mol. Struct.* **1131** (2017) 181.

B. Bardi et al., *J. Phys. Chem. C* **121** (2017) 17466.

I. M. Paczkowski et al., *J. Mol. Liq.* **319** (2020) 114277.

N.R. Paisley et al., *Mater. Chem. Front.* **4** (2020) 555.

S. Gao et al., *Chem. Eur. J.* **26** (2020) 11013.

## Polymeric photocatalysts

R. Li et al., *ACS Catal.* **8** (2018) 4735.

G.-B. Wang et al., *Chem. Commun.* **56** (2020) 12612.

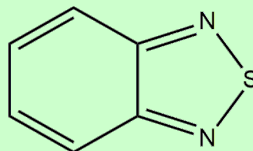

## Fluorescent probes and thermometers

S. Uchiyama et al., *Chem. Eur. J.* **18** (2012) 9552.

S. Uchiyama et al., *Analyst* **140** (2015) 4498.

I. Raitz et al., *ACS Omega* **2** (2017) 3774.

H. Appelqvist et al., *Bioconjugate Chem.* **28** (2017) 1363.

V.S. Souza et al., *Sens. Actuators B. Chem.* **321** (2020) 128530.

## Solar and photovoltaic cells

Y. Wu, W. Zhu, *Chem. Soc. Rev.* **42** (2013) 2039.

S. Halliday et al., *Prog. Polym. Sci.* **70** (2017) 34.

C. Wang et al., *Chin. J. Polym. Sci.* **39** (2021) 525.

P. Zheng et al., *New J. Chem.* **45** (2021) 4443.

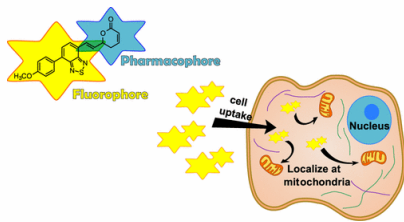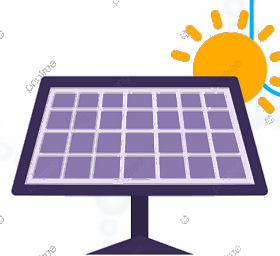

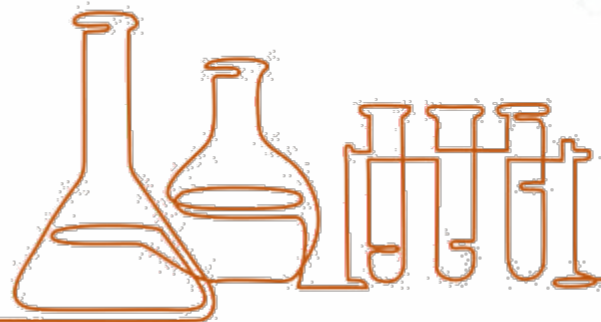

# Synthesis

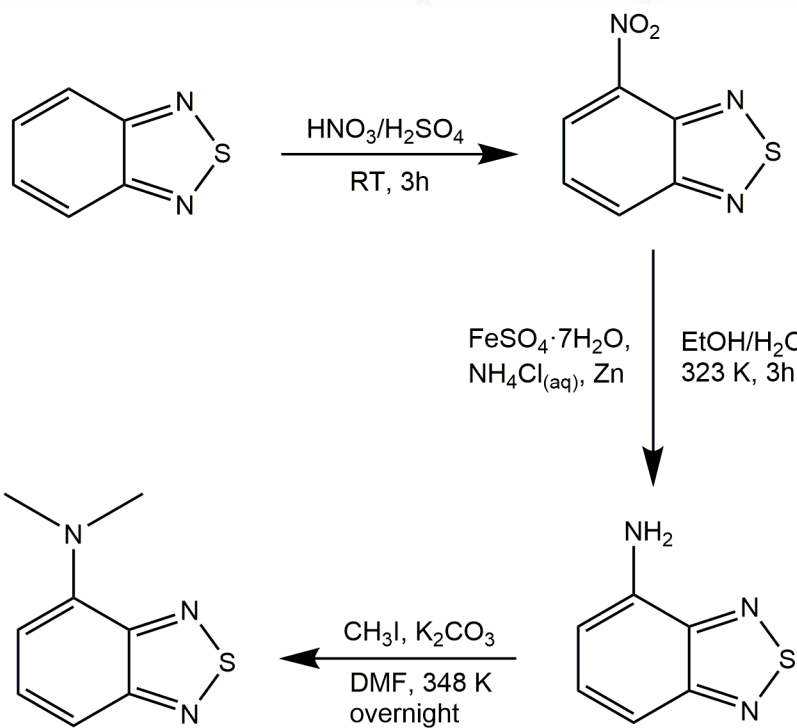

**Step 1: Nitration**

**Step 2: Reduction**

**Step 3: Methylation**

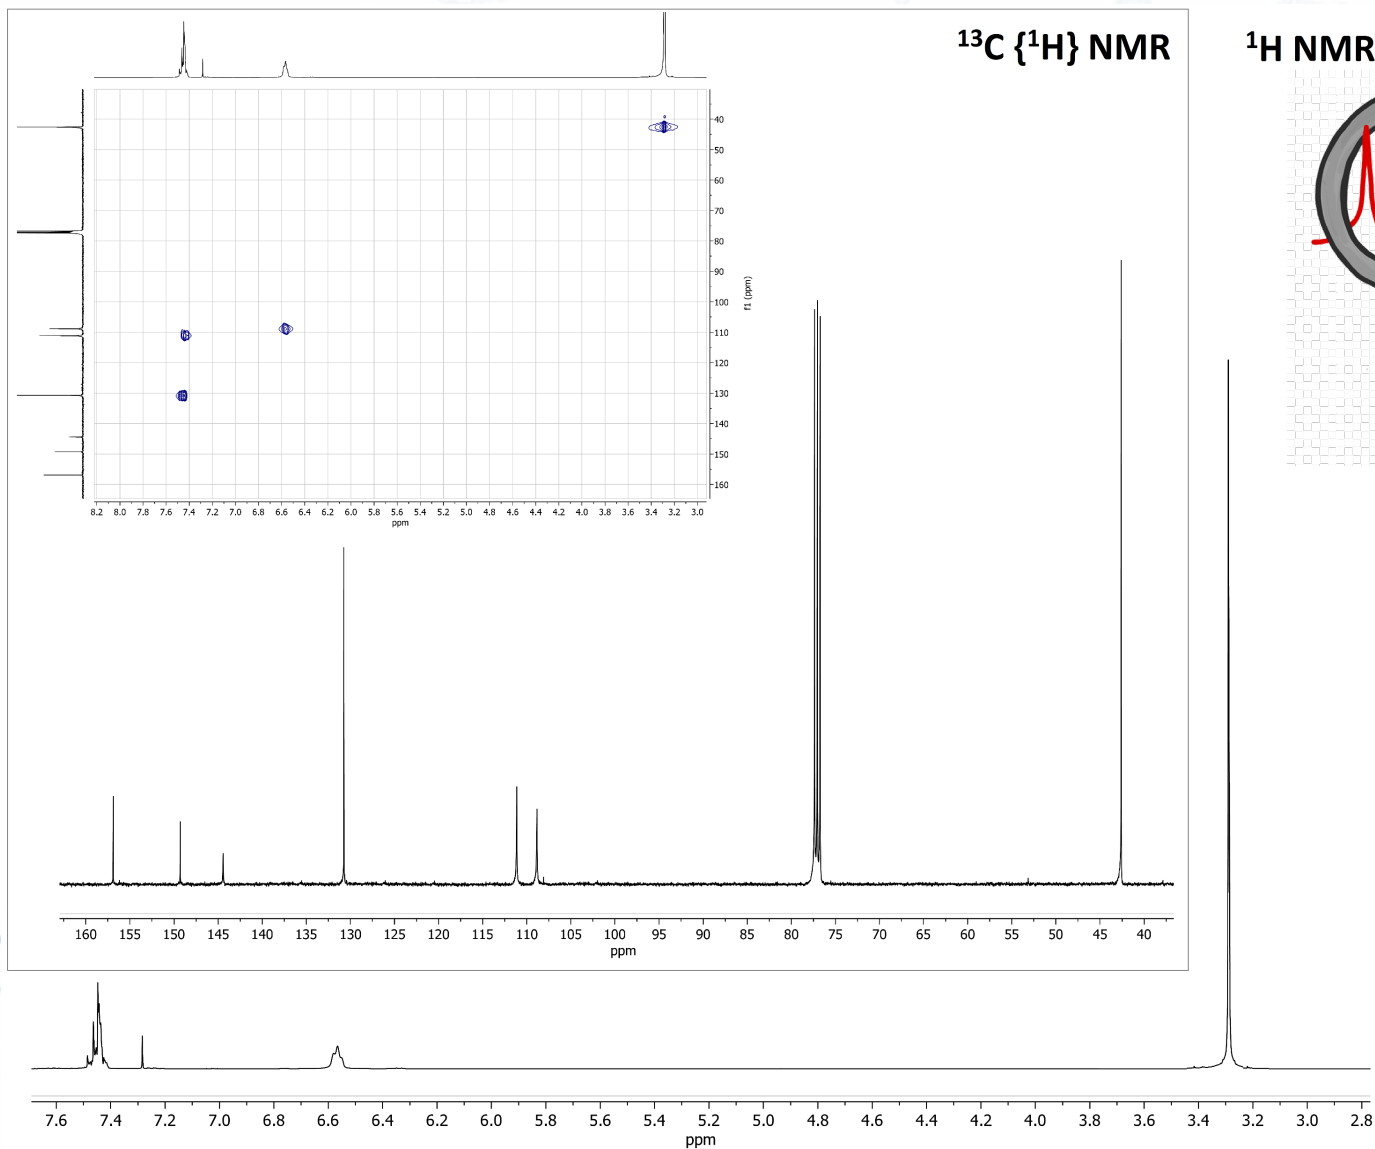

$^1\text{H}$  NMR spectrum of  $\text{BTDMe}_2$  in  $\text{CDCl}_3$  at 298 K. Inset:  $^{13}\text{C} \{^1\text{H}\}$  NMR and  $^1\text{H}$ - $^{13}\text{C}$  HSQC in  $\text{CDCl}_3$  at 298 K

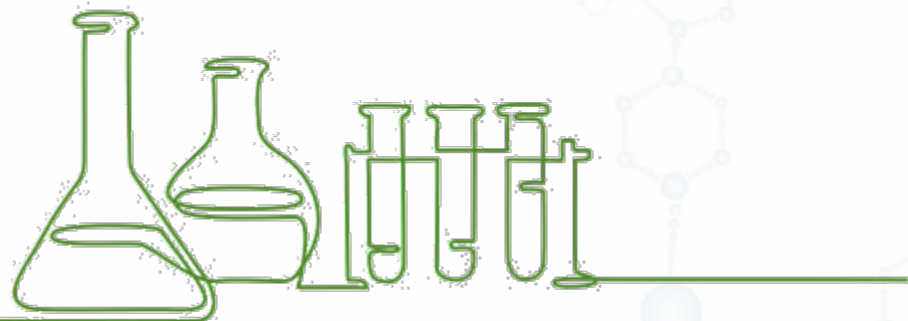

# Spectroscopic characterization

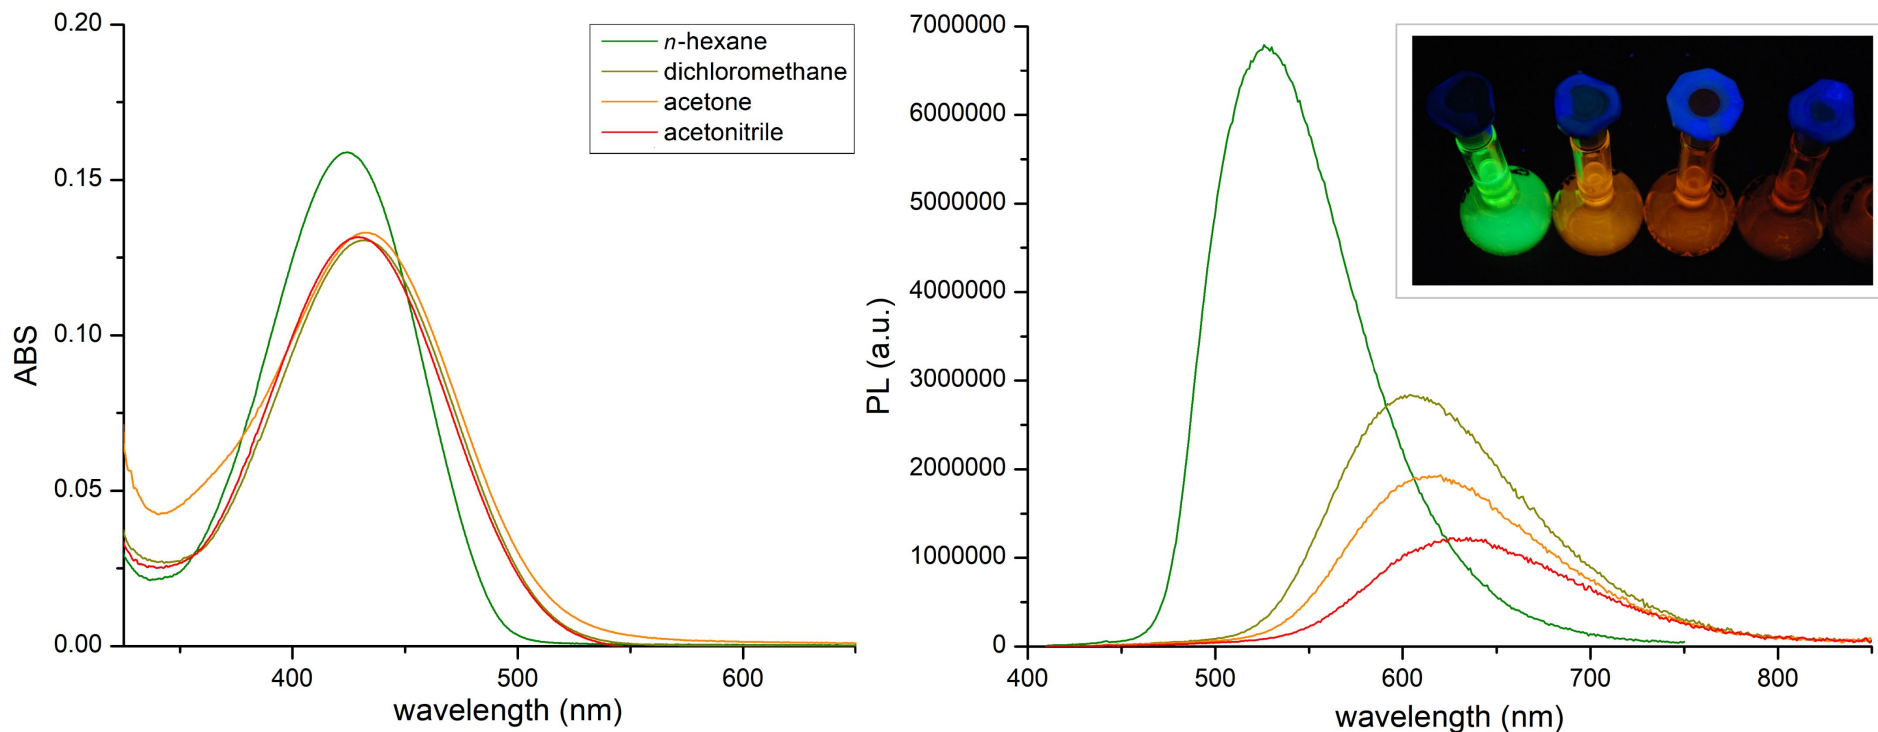

Absorption and emission spectra of  $5 \cdot 10^{-5}$  M solutions of BTD<sup>NMe2</sup> in different solvents recorded at room temperature.

Inset: picture of the solutions under UV light ( $\lambda_{\text{excitation}} = 365$  nm).

| Solvent          | $\epsilon$ | $n$   | ABS max (nm) <sup>a</sup> | PL max (nm) <sup>b</sup> | Stokes shift (cm <sup>-1</sup> ) | $\Phi_F$ (%) <sup>c</sup> | Orientation Polarizability |
|------------------|------------|-------|---------------------------|--------------------------|----------------------------------|---------------------------|----------------------------|
| <i>n</i> -hexane | 1.9        | 1.375 | 424                       | 526                      | 4559                             | 52                        | 0.001                      |
| Dichloromethane  | 8.9        | 1.424 | 432                       | 604                      | 6613                             | 41                        | 0.217                      |
| Acetone          | 20.7       | 1.359 | 433                       | 616                      | 6872                             | 23                        | 0.284                      |
| Acetonitrile     | 37.5       | 1.479 | 430                       | 630                      | 7448                             | 16                        | 0.305                      |

<sup>a</sup> 298 K. <sup>b</sup>  $\lambda_{\text{excitation}} = 390$  nm, 298 K. <sup>c</sup> Data obtained using a solution of anthracene in ethanol as standard ( $\Phi_F = 27\%$ ).

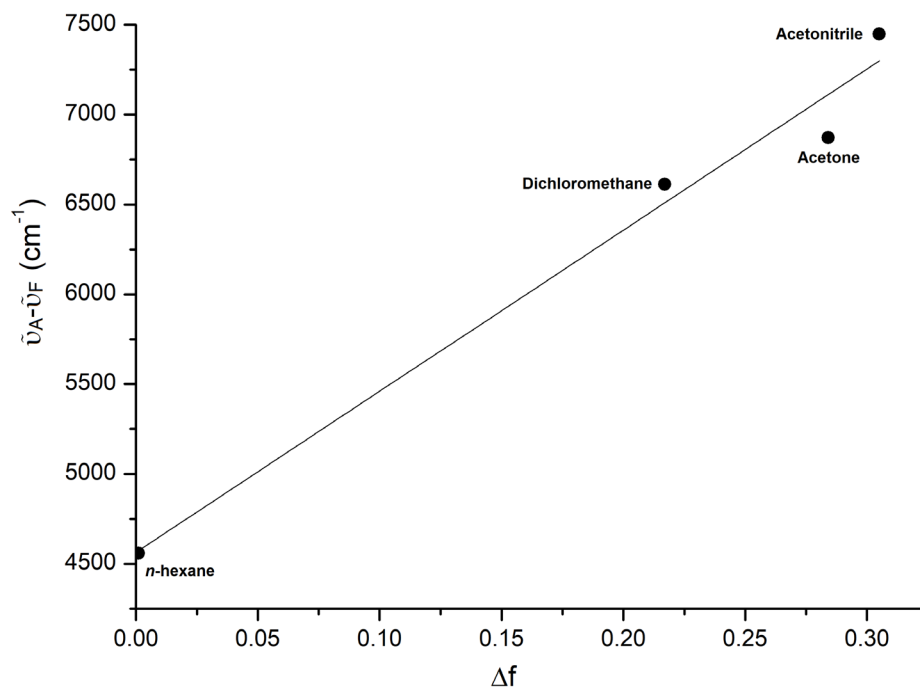

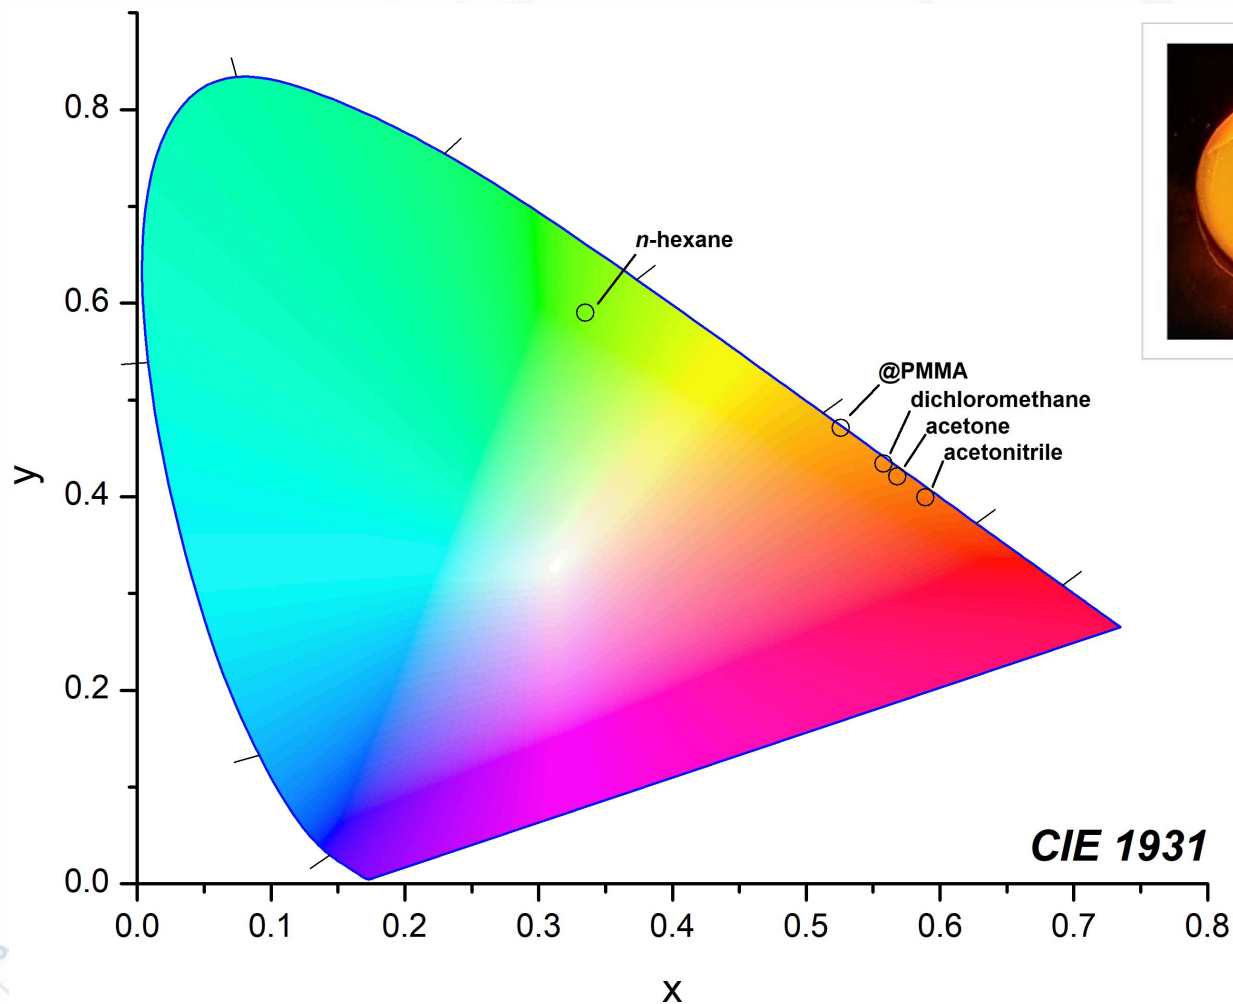

CIE 1931 chromaticity diagram of BTDM<sup>NMe2</sup> in different solvents and in PMMA (**n-hexane**: x = 0.335, y = 0.590; **dichloromethane**: x = 0.558, y = 0.434; **acetone**: x = 0.561, y = 0.421; **acetonitrile**: x = 0.589, y = 0.399; **@PMMA**: x = 0.526, y = 0.471).

Inset: BTDM<sup>NMe2</sup>@PMMA excited at 365 nm.

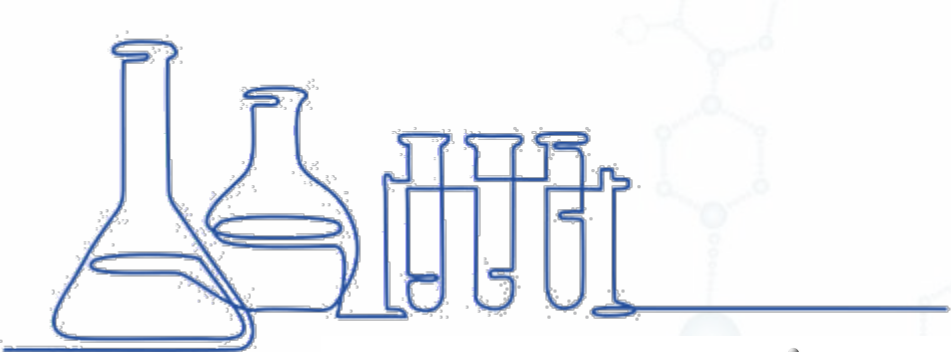

# DFT calculations and voltammetry

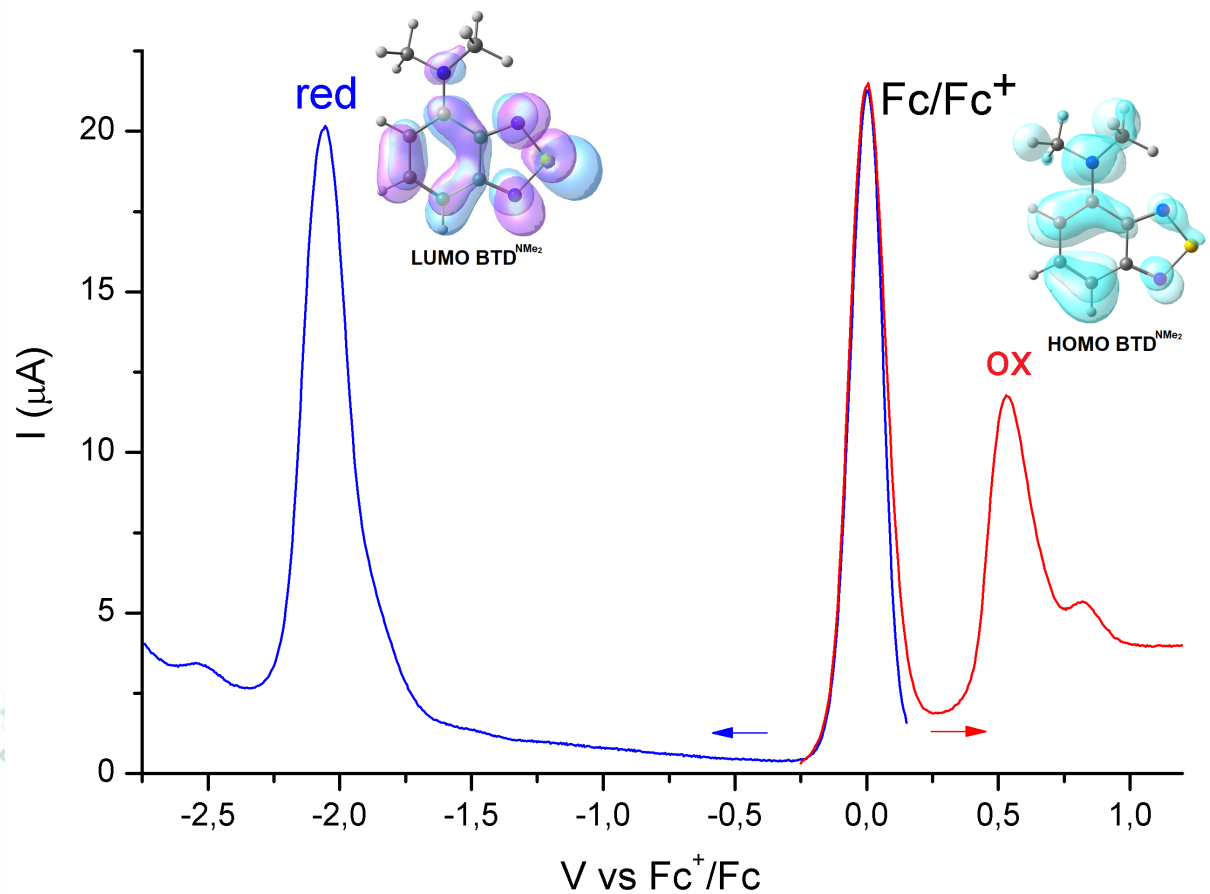

Square wave voltammetry of  $\text{BTD}^{\text{NMe}_2}$  ( $\text{CH}_3\text{CN}/\text{LiClO}_4$ , ferrocene as internal reference, blue line: reduction, red line: oxidation) and frontier molecular orbitals (surface isovalue 0.03 a.u.).



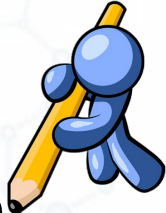

# Conclusion

- *N,N*-dimethyl-4-amino-2,1,3-benzothiadiazole (BTD<sup>NMe2</sup>) was prepared from 2,1,3-benzothiadiazole in a three steps synthetic path that involved nitration, subsequent reduction and methylation.
- The compound was fully characterized by means of nuclear magnetic resonance (NMR) and infrared spectroscopy.
- The compound revealed to be highly fluorescent and characterized by a noticeable solvatochromism.
- The emission features, rationalized on the basis of electrochemical measurements and DFT calculations, were maintained once embedded in polymethylmetacrylate.
- The photoluminescence properties exhibited by BTD<sup>NMe2</sup> make it a suitable candidate for advanced technology applications.
